# Supplementary material
Source: PubMed Central journal article supplement (PMC8649071)
Supplement: NIHMS1729186-supplement-supinfo.pdf [file NIHMS1729186-supplement-supinfo.pdf]

## **Savings and Outcomes Under Medicare’s Bundled Payments Initiative for Skilled Nursing Facilities**

Karen E. Joynt Maddox, M.D., M.P.H.<sup>a,b</sup>, Michael L. Barnett, M.D., M.S.<sup>c,d</sup>, E. John Orav, Ph.D.<sup>e,f</sup>, Jie Zheng, Ph.D.<sup>c</sup>, David C. Grabowski, Ph.D.<sup>f</sup>, and Arnold M. Epstein, M.D., M.A.<sup>c,d</sup>

### **Supplemental Information**

|                                                                                                                                                |           |
|------------------------------------------------------------------------------------------------------------------------------------------------|-----------|
| <b>Supplementary Methods</b> .....                                                                                                             | <b>2</b>  |
| <b>Supplementary Table S1: Enrollment of Skilled Nursing Facilities in BPCI</b> .....                                                          | <b>4</b>  |
| <b>Supplementary Figure S1: Flowchart of SNF Inclusion and Exclusion</b> .....                                                                 | <b>5</b>  |
| <b>Supplementary Figure S2: Flowchart of Patient Inclusion and Exclusion</b> .....                                                             | <b>6</b>  |
| <b>Supplementary Table S2: Conditions Selected by Skilled Nursing Facilities in BPCI</b> .....                                                 | <b>7</b>  |
| <b>Supplementary Figure S3: Outcomes and Total Medicare Payments of Skilled Nursing Facility Patients by Frailty Quintile</b> .....            | <b>9</b>  |
| <b>Supplementary Table S3: Baseline Skilled Nursing Facility and Market Characteristics, Before Matching</b> .....                             | <b>10</b> |
| <b>Supplementary Table S4: Baseline Skilled Nursing Facility and Market Characteristics, BPCI Wave 1 versus Wave 2</b> .....                   | <b>11</b> |
| <b>Supplementary Table S5: Differences in Changes in Quarterly Slopes in Medicare Payments per Episode by Wave and Dementia Subgroup</b> ..... | <b>12</b> |
| <b>Supplementary Table S6: Differences in Changes in Quarterly Slopes in Volume and Case Mix by Wave and Dementia Subgroup</b> .....           | <b>14</b> |
| <b>Supplementary Table S7: Differences in Changes in Quarterly Slopes in Clinical Outcomes by Wave and Dementia Subgroup</b> .....             | <b>16</b> |

---

<sup>a</sup> Cardiovascular Division, Department of Medicine, Washington University School of Medicine, St. Louis MO

<sup>b</sup> Center for Health Economics and Policy, Institute for Public Health at Washington University, St. Louis MO

<sup>c</sup> Department of Health Policy and Management, Harvard T.H. Chan School of Public Health, Boston MA

<sup>d</sup> Division of General Internal Medicine and Primary Care, Department of Medicine, Brigham and Women’s Hospital, Boston MA

<sup>e</sup> Department of Biostatistics, Harvard T.H. Chan School of Public Health, Boston MA

<sup>f</sup> Department of Health Care Policy, Harvard Medical School, Boston MA

## Supplementary Methods

### *Cost Standardization Methodology:*

Our cost standardization methodology follows published guidance from the Centers for Medicare and Medicaid Services, which can be found at this link:

[https://resdac.org/sites/datadocumentation.resdac.org/files/CMS%20Part%20A%20and%20Part%20B%20Price%20%28Payment%29%20Standardization\\_Basics\\_1.pdf](https://resdac.org/sites/datadocumentation.resdac.org/files/CMS%20Part%20A%20and%20Part%20B%20Price%20%28Payment%29%20Standardization_Basics_1.pdf)

Briefly, the goal of cost standardization is to adjust the allowed charge for any particular item or service such that it reflects only the item or service delivered, and thus intensity of resource use, but does not reflect differences based on geography or from special Medicare programs such as those for teaching or safety-net hospitals. As such, it preserves differences that are related to specific health care delivery options, such as differences in the payment for a service rendered in an emergency department versus an urgent care clinic, or by a physician rather than a nurse practitioner. However, it removes differences related to geography, such as adjustments for hospital wage index and geographic practice cost index, which were developed to recognize differential cost of living in various parts of the country. It also removes payment adjustments that are applied to specific facilities or types of facilities, such as graduate medical education, indirect medical education, disproportionate share hospital payments, value-based purchasing payment adjustments, and adjustments related to other payment models or quality reporting programs. In cases where there are differential rates by state for particular goods or services, these are also replaced by a national rate.

CMS provides specific guidelines on how to calculate standardized costs from various scenarios, which can be accessed at the link above.

### *Frailty Index Methodology:*

Our frailty index methodology follows the validated frailty index proposed and tested by Kim et al (Kim DH, Schneeweiss S, Glynn RJ, Lipsitz LA, Rockwood K, Avorn J. Measuring Frailty in Medicare Data: Development and Validation of a Claims-Based Frailty Index. *J Gerontol A Biol Sci Med Sci.* 2018 Jun 14;73(7):980-987). Briefly, the index uses a series of claims-based identifiers, based on codes, to assign points to beneficiaries. It assesses for a wide range of diagnoses (ie codes for degenerative diseases of the central nervous system), equipment (ie a claim for a wheelchair), and services, each of which is assigned a specific coefficient. These coefficients are added together for each beneficiary to arrive at a final frailty index, which then has specified cutoffs for pre-frail, frail, and so forth. Because we only had access to inpatient claims, we could only include claims that appeared in each patient's inpatient records in the year prior to their index SNF admission. To test this modification, we conducted analyses among a 20% sample of patients comparing the frailty index calculated across all files to the index calculated using only inpatient claims and found their correlation to be 0.84. We also calculated payments and outcomes for quintiles of this index calculated using inpatient data

only to validate the calibration for this adaptation of the index, which is shown elsewhere in the supplement.

*Model Specifications:*

Our model for payment data was as follows, with similar models for other outcomes:

$$\text{Expected Total payments} = \text{Intercept} + \text{Time1} + \text{Time2} + \text{BPCI} + \text{Time1} * \text{BPCI} + \text{Time2} * \text{BPCI} + \text{DRG (1-101)} + \text{CCW (1-27)} + \text{MatchGroup}$$

For each SNF and its matched controls, time zero was set as the initiation of participation and the Time1 variable was an indicator for quarter, which ranged from negative 11 to positive 15. A separate intervention variable, here denoted with Time2, was set at the quarterly level, equal to zero prior to program participation, and 1 to a maximum of 15 thereafter. The significance of the interaction term between the indicator for BPCI participation and the Time2 variable determined whether there had been a greater change in slope in patients at BPCI compared to control SNFs.

**Supplementary Table S1: Enrollment of Skilled Nursing Facilities in BPCI**

| Starting Date | Timing | SNFs |      | SNF-condition pairs <sup>a</sup> |      | Patients |      | Follow-up (quarters) |
|---------------|--------|------|------|----------------------------------|------|----------|------|----------------------|
|               |        | N    | %    | N                                | %    | N        | %    |                      |
| 1/1/2014      | Early  | 51   | 5.2  | 1232                             | 13.0 | 34682    | 18.8 | 15                   |
| 4/1/2014      | n/a    | 0    |      | 0                                |      | 0        |      |                      |
| 7/1/2014      | n/a    | 0    |      | 0                                |      | 0        |      |                      |
| 10/1/2014     | n/a    | 0    |      | 0                                |      | 0        |      |                      |
| 1/1/2015      | n/a    | 0    |      | 0                                |      | 0        |      |                      |
| 4/1/2015      | Late   | 152  | 15.2 | 2530                             | 26.8 | 52363    | 28.5 | 10                   |
| 7/1/2015      | Late   | 738  | 73.7 | 5424                             | 57.4 | 90002    | 48.9 | 9                    |
| 10/1/2015     | Late   | 59   | 5.9  | 269                              | 2.9  | 6850     | 3.7  | 8                    |

Abbreviations: BPCI, Bundled Payments for Care Improvement; SNF, skilled nursing facility.

<sup>a</sup> A SNF-condition pair indicates a unique SNF and one condition for which it joined the program. SNF A joining for sepsis would constitute one SNF-condition pair; that same SNF joining for stroke would constitute another.

**Supplementary Figure S1: Flowchart of SNF Inclusion and Exclusion**

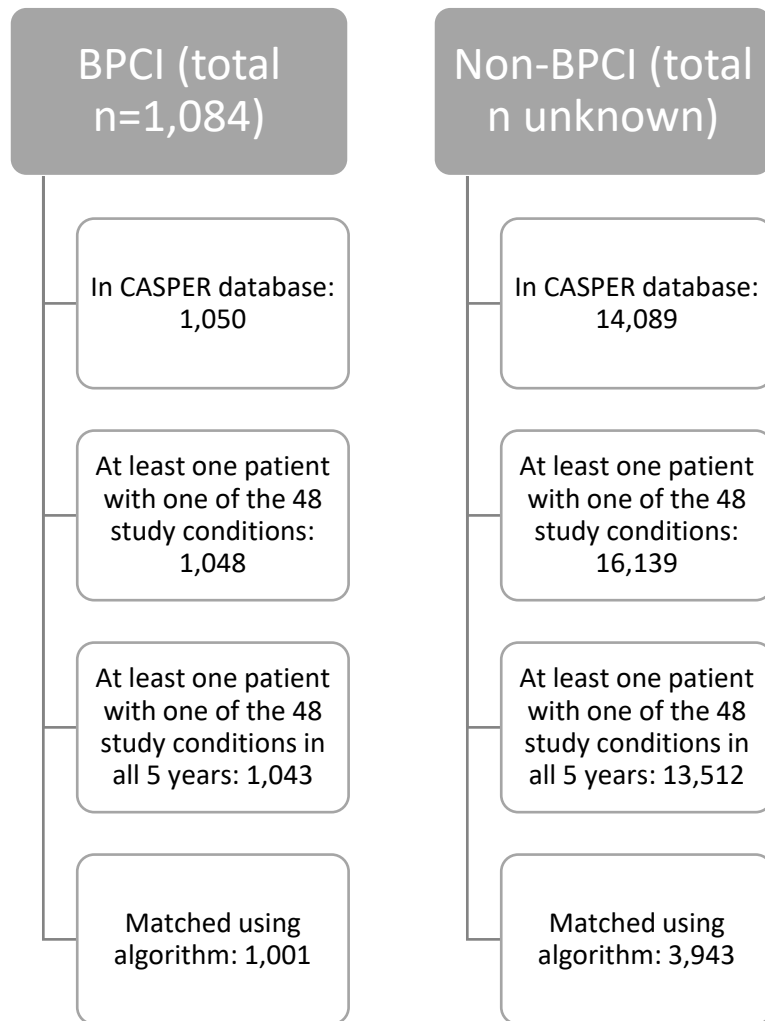

**Supplementary Figure S2: Flowchart of Patient Inclusion and Exclusion**

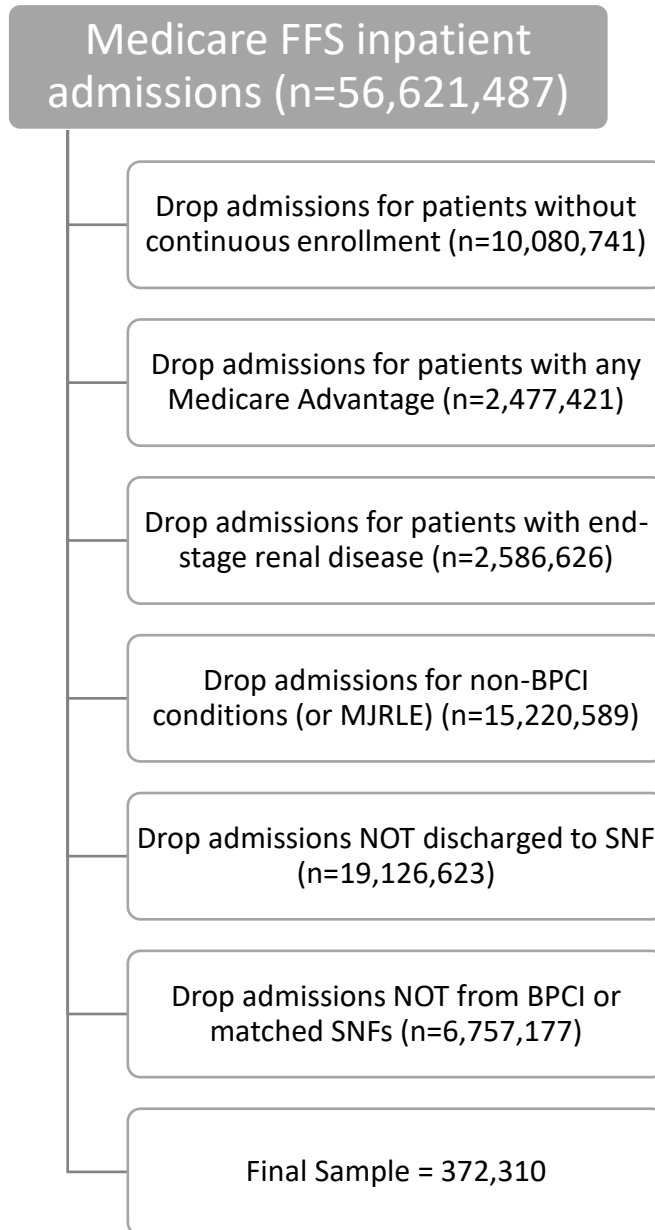

FFS=fee-for-service. BPCI patient-level Model 3-related exclusion criteria that were NOT included in our algorithm were primarily those related to data availability, such as precedence rules for patients who were seen at a BPCI-participating practice. In program guidelines, such patients are assigned to practices and not attributed to BPCI-participating SNFs. Because we did not have access to practice attribution at the patient level, we could not operationalize this exclusion.

**Supplementary Table S2: Conditions Selected by Skilled Nursing Facilities in BPCI**

| <b>Conditions</b>                              | <b>N of SNFs</b> |
|------------------------------------------------|------------------|
| Major joint replacement of the lower extremity | 466              |
| Simple pneumonia and respiratory infections    | 398              |
| Congestive heart failure                       | 343              |
| Chronic obstructive pulmonary disease          | 322              |
| Sepsis                                         | 309              |
| Urinary tract infection                        | 299              |
| Hip & femur procedures except major joint      | 296              |
| Stroke                                         | 287              |
| Medical non-infectious orthopedic              | 265              |
| Other respiratory                              | 264              |
| Acute myocardial infarction                    | 251              |
| Cardiac arrhythmia                             | 233              |
| Major bowel procedure                          | 231              |
| Nutritional and metabolic disorders            | 229              |
| Fractures of the femur and hip or pelvis       | 226              |
| Cellulitis                                     | 225              |
| Gastrointestinal hemorrhage                    | 224              |
| Esophagitis                                    | 222              |
| Renal failure                                  | 219              |
| Lower extremity and humerus procedure          | 195              |
| Syncope & collapse                             | 194              |
| Revision of the hip or knee                    | 187              |
| Gastrointestinal obstruction                   | 185              |
| Pacemaker                                      | 185              |
| Diabetes                                       | 184              |
| Medical peripheral vascular disorders          | 174              |
| Other vascular surgery                         | 173              |
| Red blood cell disorders                       | 163              |
| Transient ischemia                             | 163              |
| Cardiac valve                                  | 156              |
| Percutaneous coronary intervention             | 148              |
| Major joint replacement of the upper extremity | 143              |
| Coronary artery bypass graft                   | 139              |
| Amputation                                     | 137              |
| Spinal fusion (non-cervical)                   | 119              |
| Other knee procedures                          | 117              |
| Chest pain                                     | 107              |
| Major cardiovascular procedure                 | 89               |

|                                                        |           |
|--------------------------------------------------------|-----------|
| <b>Removal of orthopedic devices</b>                   | <b>83</b> |
| <b>Back &amp; neck except spinal fusion</b>            | <b>81</b> |
| <b>Cervical spinal fusion</b>                          | <b>70</b> |
| <b>Atherosclerosis</b>                                 | <b>67</b> |
| <b>Complex non-cervical spinal fusion</b>              | <b>58</b> |
| <b>Cardiac defibrillator</b>                           | <b>54</b> |
| <b>Double joint replacement of the lower extremity</b> | <b>52</b> |
| <b>Pacemaker device replacement or revision</b>        | <b>48</b> |
| <b>Combined anterior posterior spinal fusion</b>       | <b>40</b> |
| <b>AICD generator or lead</b>                          | <b>12</b> |

Abbreviations: AICD=automated implantable cardioverter defibrillator; BPCI, Bundled Payments for Care Improvement; SNF, skilled nursing facility.



**Supplementary Figure S3: Outcomes and Total Medicare Payments of Skilled Nursing Facility Patients by Frailty Quintile**

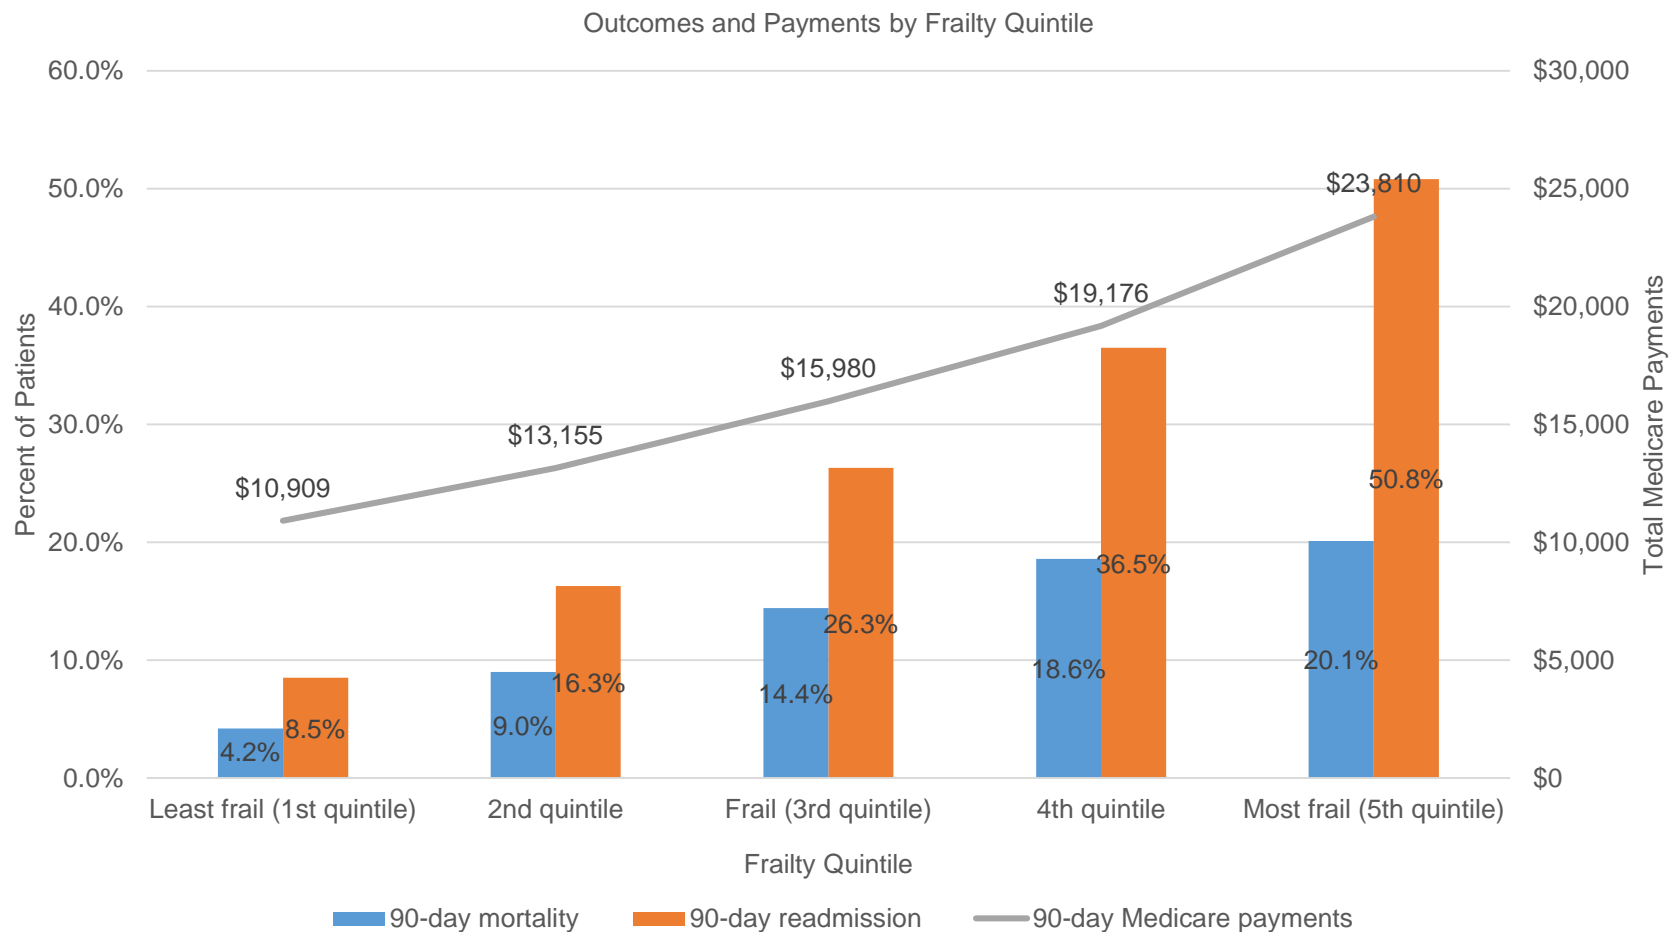

**Supplementary Table S3: Baseline Skilled Nursing Facility and Market Characteristics, Before Matching**

|                                                            | <b>All BPCI SNFs<br/>(n=1,043)</b> | <b>All non-BPCI SNFs<br/>(n=13,512)</b> | <b>SMD</b> |
|------------------------------------------------------------|------------------------------------|-----------------------------------------|------------|
| <b>Baseline Volume (admissions), mean (SD)</b>             | 121.3 (111.7)                      | 81.1 (86.6)                             | 0.45       |
| <b>Profit Status: For Profit</b>                           | 901 (86.4%)                        | 9372 (69.4%)                            | 0.38       |
| <b>Profit Status: Non-Profit</b>                           | 118 (11.3%)                        | 3298 (24.4%)                            | 0.31       |
| <b>Profit Status: Government</b>                           | 24 (2.3%)                          | 842 (6.2%)                              | 0.17       |
| <b>Urban</b>                                               | 876 (84.0%)                        | 9648 (71.4%)                            | 0.28       |
| <b>Number of Federally Certified Beds, mean (SD)</b>       | 118.6 (54.2)                       | 108.2 (61.3)                            | 0.17       |
| <b>SNF in chain</b>                                        | 903 (86.6%)                        | 7575 (56.1%)                            | 0.63       |
| <b>SNF hospital based</b>                                  | 7 (0.7%)                           | 594 (4.4%)                              | 0.19       |
| <b>Region: Northeast</b>                                   | 262 (25.1%)                        | 2289 (16.9%)                            | 0.22       |
| <b>Region: Midwest</b>                                     | 274 (26.3%)                        | 4450 (32.9%)                            | 0.14       |
| <b>Region: South</b>                                       | 343 (32.9%)                        | 4782 (35.4%)                            | 0.05       |
| <b>Region: West</b>                                        | 159 (15.2%)                        | 1986 (14.7%)                            | 0.02       |
| <b>Overall Star Rating, mean (SD)</b>                      | 3.29 (1.39)                        | 3.30 (1.39)                             | 0.01       |
| <b>County Characteristics<sup>a</sup></b>                  |                                    |                                         |            |
| <b>Population 65+ in county, mean (SD)</b>                 | 107017 (154525)                    | 101743 (208713)                         | 0.03       |
| <b>Median Household Income, \$</b>                         | 53667                              | 51474                                   | 0.17       |
| <b>% Medicare Advantage, mean (SD)</b>                     | 28.82 (13.10)                      | 26.03 (14.20)                           | 0.20       |
| <b>SNF beds Per 10,000 in county, mean (SD)</b>            | 411.3 (190.2)                      | 471 (232.1)                             | 0.26       |
| <b># Rehabilitation hospitals, mean (SD)</b>               | 0.55 (1.15)                        | 0.48 (1.07)                             | 0.07       |
| <b>SNF average market share,<sup>b</sup> mean (SD)</b>     | 0.14 (0.21)                        | 0.2 (0.26)                              | 0.21       |
| <b>Market competitiveness (HHI),<sup>c</sup> mean (SD)</b> | 0.03 (0.03)                        | 0.04 (0.04)                             | 0.10       |

Abbreviations: BPCI, Bundled Payments for Care Improvement; HHI, Herfindahl-Hirschman index; SMD, standardized mean difference; SNF, skilled nursing facility.

<sup>a</sup> All county level characteristics are from 2013, other than the number of rehabilitation hospitals which is from 2012.

<sup>b</sup> Markets are defined using counties.

<sup>c</sup> HHI is defined as the sum of the squares of each provider's market share, such that a perfectly competitive market has an HHI near zero, and a completely concentrated market has an HHI of one.

**Supplementary Table S4: Baseline Skilled Nursing Facility and Market Characteristics, BPCI Wave 1 versus Wave 2**

|                                                            | Wave 1 BPCI SNFs<br>(n=52) | Wave 2 BPCI<br>SNFs (n=949) | SMD  |
|------------------------------------------------------------|----------------------------|-----------------------------|------|
| <b>N of BPCI conditions joined, mean (SD)</b>              | 23.7 (16.4)                | 8.7 (11.1)                  | 1.32 |
| <b>Baseline Volume (admissions), mean (SD)</b>             | 165.3 (119.4)              | 108.9 (92.9)                | 0.60 |
| <b>Profit Status: For Profit</b>                           | 41 (78.8%)                 | 818 (86.2%)                 | 0.21 |
| <b>Profit Status: Non-Profit</b>                           | 11 (21.2%)                 | 107 (11.3%)                 | 0.31 |
| <b>Profit Status: Government</b>                           | 0 (0.0%)                   | 24 (2.5%)                   | 0.17 |
| <b>Urban</b>                                               | 52 (100.0%)                | 782 (82.4%)                 | 0.47 |
| <b>Number of Federally Certified Beds, mean (SD)</b>       | 145.7 (55.1)               | 116.8 (53.5)                | 0.54 |
| <b>SNF in chain</b>                                        | 47 (90.4%)                 | 814 (85.8%)                 | 0.13 |
| <b>SNF hospital based</b>                                  | 2 (3.8%)                   | 5 (0.5%)                    | 0.40 |
| <b>Region: Northeast</b>                                   | 21 (40.4%)                 | 225 (23.7%)                 | 0.39 |
| <b>Region: Midwest</b>                                     | 27 (51.9%)                 | 239 (25.2%)                 | 0.61 |
| <b>Region: South</b>                                       | 2 (3.8%)                   | 334 (35.2%)                 | 0.67 |
| <b>Region: West</b>                                        | 2 (3.8%)                   | 151 (15.9%)                 | 0.34 |
| <b>Overall Star Rating, mean (SD)</b>                      | 3.46 (1.28)                | 3.25 (1.41)                 | 0.15 |
| <b>County Characteristics<sup>a</sup></b>                  |                            |                             |      |
| <b>Population 65+ in county, mean (SD)</b>                 | 221234 (227187)            | 98654 (146681)              | 0.81 |
| <b>Median Household Income, \$</b>                         | 55431                      | 53361                       | 0.15 |
| <b>% Medicare Advantage, mean (SD)</b>                     | 27.22 (10.59)              | 28.97 (13.26)               | 0.13 |
| <b>SNF beds Per 10,000 in county, mean (SD)</b>            | 448.2 (108.1)              | 412.7 (195.7)               | 0.19 |
| <b># Rehabilitation hospitals, mean (SD)</b>               | 0.67 (0.79)                | 0.53 (1.17)                 | 0.12 |
| <b>SNF average market share,<sup>b</sup> mean (SD)</b>     | 0.05 (0.06)                | 0.15 (0.22)                 | 0.46 |
| <b>Market competitiveness (HHI),<sup>c</sup> mean (SD)</b> | 0.03 (0.03)                | 0.03 (0.03)                 | 0.03 |

Abbreviations: BPCI, Bundled Payments for Care Improvement; HHI, Herfindahl-Hirschman index; SMD, standardized mean difference; SNF, skilled nursing facility.

<sup>a</sup> All county level characteristics are from 2013, other than the number of rehabilitation hospitals which is from 2012.

<sup>b</sup> Markets are defined using counties.

<sup>c</sup> HHI is defined as the sum of the squares of each provider's market share, such that a perfectly competitive market has an HHI near zero, and a completely concentrated market has an HHI of one.

**Supplementary Table S5: Differences in Changes in Quarterly Slopes in Medicare Payments per Episode by Wave and Dementia Subgroup**

| <b>WAVE 1</b>               | <b>BPCI Status</b> | <b>First Quarter</b> | <b>Baseline slope</b> | <b>Intervention slope</b> | <b>Change</b> | <b>Lower CI</b> | <b>Upper CI</b> | <b>p</b> |
|-----------------------------|--------------------|----------------------|-----------------------|---------------------------|---------------|-----------------|-----------------|----------|
| <b>Total Payments</b>       | BPCI               | \$33,261             | \$20                  | -\$382                    | -\$402        | -\$707          | -\$96           | 0.010    |
|                             | Non-BPCI           | \$28,662             | \$356                 | -\$332                    | -\$688        | -\$1,052        | -\$325          | <0.001   |
|                             | Difference         |                      | -\$337                | -\$50                     | \$287         | -\$199          | \$772           | 0.247    |
| <b>Initial SNF stay</b>     | BPCI               | \$15,452             | -\$144                | -\$197                    | -\$53         | -\$240          | \$134           | 0.580    |
|                             | Non-BPCI           | \$14,187             | \$235                 | -\$177                    | -\$412        | -\$712          | -\$111          | 0.007    |
|                             | Difference         |                      | -\$378                | -\$19                     | \$359         | \$4             | \$713           | 0.047    |
| <b>Readmission</b>          | BPCI               | \$8,699              | -\$61                 | -\$37                     | \$24          | -\$71           | \$120           | 0.615    |
|                             | Non-BPCI           | \$7,486              | -\$50                 | -\$42                     | \$8           | -\$95           | \$112           | 0.873    |
|                             | Difference         |                      | -\$11                 | \$5                       | \$16          | -\$119          | \$151           | 0.817    |
| <b>Outpatient/Clinician</b> | BPCI               | \$5,991              | \$191                 | -\$3                      | -\$193        | -\$230          | -\$156          | <0.001   |
|                             | Non-BPCI           | \$5,183              | \$180                 | \$2                       | -\$177        | -\$216          | -\$138          | <0.001   |
|                             | Difference         |                      | \$11                  | -\$5                      | -\$16         | -\$70           | \$37            | 0.552    |
| <b>WAVE 2</b>               |                    |                      |                       |                           |               |                 |                 |          |
| <b>Total Payments</b>       | BPCI               | \$27,312             | \$119                 | -\$480                    | -\$598        | -\$688          | -\$509          | <0.001   |
|                             | Non-BPCI           | \$29,680             | \$55                  | -\$405                    | -\$460        | -\$543          | -\$377          | <0.001   |
|                             | Difference         |                      | \$64                  | -\$75                     | -\$138        | -\$260          | -\$17           | 0.026    |
| <b>Initial SNF stay</b>     | BPCI               | \$13,608             | \$9                   | -\$295                    | -\$304        | -\$366          | -\$242          | <0.001   |
|                             | Non-BPCI           | \$15,446             | \$76                  | -\$244                    | -\$320        | -\$382          | -\$259          | <0.001   |
|                             | Difference         |                      | -\$67                 | -\$51                     | \$17          | -\$71           | \$104           | 0.711    |
| <b>Readmission</b>          | BPCI               | \$6,993              | \$12                  | -\$48                     | -\$61         | -\$83           | -\$38           | <0.001   |
|                             | Non-BPCI           | \$7,448              | -\$26                 | -\$41                     | -\$15         | -\$36           | \$7             | 0.185    |
|                             | Difference         |                      | \$38                  | -\$7                      | -\$46         | -\$77           | -\$15           | 0.004    |
| <b>Outpatient/Clinician</b> | BPCI               | \$4,744              | \$55                  | \$2                       | -\$53         | -\$69           | -\$37           | <0.001   |
|                             | Non-BPCI           | \$4,664              | \$51                  | -\$8                      | -\$59         | -\$74           | -\$43           | <0.001   |
|                             | Difference         |                      | \$5                   | \$10                      | \$5           | -\$17           | \$27            | 0.628    |

|                             |            |          |        |        |        |        |        |        |
|-----------------------------|------------|----------|--------|--------|--------|--------|--------|--------|
| <b>DEMENTIA</b>             |            |          |        |        |        |        |        |        |
| <b>Total Payments</b>       | BPCI       | \$29,022 | \$121  | -\$363 | -\$484 | -\$603 | -\$366 | 0.000  |
|                             | Non-BPCI   | \$29,460 | \$48   | -\$405 | -\$453 | -\$564 | -\$341 | 0.000  |
|                             | Difference |          | \$74   | \$42   | -\$32  | -\$196 | \$133  | 0.706  |
| <b>Initial SNF stay</b>     | BPCI       | \$14,718 | -\$19  | -\$237 | -\$218 | -\$307 | -\$129 | 0.000  |
|                             | Non-BPCI   | \$16,020 | \$106  | -\$259 | -\$365 | -\$447 | -\$283 | 0.000  |
|                             | Difference |          | -\$125 | \$22   | \$147  | \$24   | \$269  | 0.019  |
| <b>Readmission</b>          | BPCI       | \$7,241  | \$5    | -\$18  | -\$23  | -\$55  | \$10   | 0.167  |
|                             | Non-BPCI   | \$7,278  | -\$33  | -\$57  | -\$24  | -\$58  | \$10   | 0.164  |
|                             | Difference |          | \$38   | \$39   | \$1    | -\$46  | \$48   | 0.955  |
| <b>Outpatient/Clinician</b> | BPCI       | \$4,713  | \$62   | \$9    | -\$53  | -\$77  | -\$29  | <.0001 |
|                             | Non-BPCI   | \$4,489  | \$46   | \$8    | -\$38  | -\$57  | -\$18  | 0.000  |
|                             | Difference | .        | \$16   | \$1    | -\$15  | -\$46  | \$15   | 0.328  |
| <b>NO DEMENTIA</b>          |            |          |        |        |        |        |        |        |
| <b>Total Payments</b>       | BPCI       | \$28,297 | \$105  | -\$407 | -\$512 | -\$600 | -\$424 | 0.000  |
|                             | Non-BPCI   | \$29,493 | -\$4   | -\$426 | -\$423 | -\$508 | -\$337 | 0.000  |
|                             | Difference |          | \$109  | \$19   | -\$89  | -\$212 | \$33   | 0.152  |
| <b>Initial SNF stay</b>     | BPCI       | \$13,683 | \$3    | -\$238 | -\$241 | -\$302 | -\$180 | 0.000  |
|                             | Non-BPCI   | \$14,864 | \$24   | -\$241 | -\$265 | -\$333 | -\$197 | 0.000  |
|                             | Difference |          | -\$21  | \$3    | \$24   | -\$66  | \$114  | 0.600  |
| <b>Readmission</b>          | BPCI       | \$7,372  | \$18   | -\$35  | -\$54  | -\$79  | -\$29  | 0.000  |
|                             | Non-BPCI   | \$7,529  | -\$34  | -\$57  | -\$23  | -\$46  | \$0    | 0.055  |
|                             | Difference |          | \$53   | \$22   | -\$31  | -\$66  | \$3    | 0.075  |
| <b>Outpatient/Clinician</b> | BPCI       | \$5,088  | \$63   | \$2    | -\$61  | -\$79  | -\$43  | <.0001 |
|                             | Non-BPCI   | \$4,885  | \$58   | \$3    | -\$55  | -\$73  | -\$38  | <.0001 |
|                             | Difference | .        | \$5    | -\$1   | -\$6   | -\$31  | \$19   | 0.653  |

Abbreviations: BPCI, Bundled Payments for Care Improvement; CI, confidence interval; Q1, quarter one; SNF, skilled nursing facility.

<sup>a</sup> Payments are adjusted using patient-level comorbidities from Medicare's chronic conditions warehouse (CCW) data.

**Supplementary Table S6: Differences in Changes in Quarterly Slopes in Volume and Case Mix by Wave and Dementia Subgroup**

| <b>WAVE 1</b>             | <b>BPCI Status</b> | <b>First Quarter</b> | <b>Baseline slope</b> | <b>Intervention slope</b> | <b>Change</b> | <b>Lower CI</b> | <b>Upper CI</b> | <b>p</b> |
|---------------------------|--------------------|----------------------|-----------------------|---------------------------|---------------|-----------------|-----------------|----------|
| <b>Admissions/quarter</b> | BPCI               | 34.1                 | -1.42                 | -0.65                     | 0.78          | -0.30           | 1.85            | 0.156    |
|                           | Non-BPCI           | 15.2                 | 0.73                  | 0.07                      | -0.67         | -1.62           | 0.29            | 0.173    |
|                           | Difference         |                      | -2.16                 | -0.71                     | 1.44          | 0.00            | 2.88            | 0.050    |
| <b>% Medicaid</b>         | BPCI               | 27.2%                | 0.0%                  | 0.0%                      | 0.0%          | -1.0%           | 1.0%            | 0.943    |
|                           | Non-BPCI           | 15.5%                | -1.0%                 | 0.0%                      | 1.0%          | 0.0%            | 2.0%            | 0.013    |
|                           | Difference         |                      | 1.0%                  | 0.0%                      | -1.0%         | -2.0%           | 0.0%            | 0.042    |
| <b>% Black</b>            | BPCI               | 26.2%                | 1.0%                  | 0.0%                      | -1.0%         | -1.0%           | 0.0%            | 0.064    |
|                           | Non-BPCI           | 9.5%                 | 0.0%                  | 0.0%                      | 1.0%          | 0.0%            | 1.0%            | 0.061    |
|                           | Difference         |                      | 1.0%                  | 0.0%                      | -1.0%         | -2.0%           | 0.0%            | 0.003    |
| <b>N of comorbidities</b> | BPCI               | 7.0                  | -0.09                 | 0.01                      | 0.10          | 0.03            | 0.16            | 0.004    |
|                           | Non-BPCI           | 6.9                  | -0.02                 | 0.01                      | 0.03          | -0.03           | 0.09            | 0.282    |
|                           | Difference         |                      | -0.06                 | 0.00                      | 0.06          | -0.03           | 0.16            | 0.165    |
| <b>WAVE 2</b>             |                    |                      |                       |                           |               |                 |                 |          |
| <b>Admissions/quarter</b> | BPCI               | 10.8                 | -0.01                 | 0.01                      | 0.02          | -0.06           | 0.1             | 0.637    |
|                           | Non-BPCI           | 5.2                  | -0.04                 | 0.02                      | 0.06          | 0.02            | 0.1             | 0.004    |
|                           | Difference         |                      | 0.03                  | -0.01                     | -0.04         | -0.13           | 0.05            | 0.373    |
| <b>% Medicaid</b>         | BPCI               | 25.1%                | 0.0%                  | 0.0%                      | 0.0%          | 0.0%            | 1.0%            | 0.002    |
|                           | Non-BPCI           | 27.3%                | 0.0%                  | 0.0%                      | 0.0%          | 0.0%            | 1.0%            | <0.001   |
|                           | Difference         |                      | 0.0%                  | 0.0%                      | 0.0%          | 0.0%            | 0.0%            | 0.538    |
| <b>% Black</b>            | BPCI               | 6.8%                 | 0.0%                  | 0.0%                      | 0.0%          | 0.0%            | 0.0%            | 0.816    |
|                           | Non-BPCI           | 7.9%                 | 0.0%                  | 0.0%                      | 0.0%          | 0.0%            | 0.0%            | 0.285    |
|                           | Difference         |                      | 0.0%                  | 0.0%                      | 0.0%          | 0.0%            | 0.0%            | 0.360    |
| <b>N of comorbidities</b> | BPCI               | 6.2                  | 0.00                  | 0.01                      | 0.01          | -0.01           | 0.03            | 0.233    |
|                           | Non-BPCI           | 6.3                  | -0.01                 | 0.02                      | 0.03          | 0.02            | 0.05            | <0.001   |
|                           | Difference         |                      | 0.01                  | -0.01                     | -0.02         | -0.04           | 0.00            | 0.057    |

|                           |            |       |       |       |       |       |       |       |
|---------------------------|------------|-------|-------|-------|-------|-------|-------|-------|
| <b>DEMENTIA</b>           |            |       |       |       |       |       |       |       |
| <b>Admissions/quarter</b> | BPCI       | 4.8   | -0.01 | 0.02  | 0.03  | -0.03 | 0.08  | 0.379 |
|                           | Non-BPCI   | 3.1   | -0.05 | 0.00  | 0.05  | 0.00  | 0.10  | 0.036 |
|                           | Difference |       | 0.04  | 0.02  | -0.02 | -0.10 | 0.05  | 0.551 |
| <b>% Medicaid</b>         | BPCI       | 31.8% | -0.2% | 0.3%  | 0.5%  | 0.2%  | 0.9%  | 0.004 |
|                           | Non-BPCI   | 30.5% | -0.5% | 0.1%  | 0.6%  | 0.3%  | 0.9%  | 0.000 |
|                           | Difference |       | 0.2%  | 0.2%  | 0.0%  | -0.5% | 0.4%  | 0.852 |
| <b>% Black</b>            | BPCI       | 14.6% | 0.2%  | 0.3%  | 0.1%  | -0.1% | 0.4%  | 0.390 |
|                           | Non-BPCI   | 10.4% | -0.1% | -0.2% | -0.1% | -0.4% | 0.1%  | 0.276 |
|                           | Difference |       | 0.3%  | 0.5%  | 0.2%  | -0.1% | 0.6%  | 0.164 |
| <b>N of comorbidities</b> | BPCI       | 8.1   | 0.00  | 0.02  | 0.02  | 0.00  | 0.04  | 0.106 |
|                           | Non-BPCI   | 8.1   | -0.01 | 0.02  | 0.03  | 0.01  | 0.05  | 0.004 |
|                           | Difference |       | 0.01  | 0.00  | -0.01 | -0.04 | 0.02  | 0.421 |
| <b>NO DEMENTIA</b>        |            |       |       |       |       |       |       |       |
| <b>Admissions/quarter</b> | BPCI       | 9.6   | 0.11  | -0.08 | -0.18 | -0.29 | -0.08 | 0.001 |
|                           | Non-BPCI   | 4.9   | -0.02 | -0.04 | -0.01 | -0.09 | 0.06  | 0.736 |
|                           | Difference |       | 0.13  | -0.04 | -0.17 | -0.31 | -0.03 | 0.017 |
| <b>% Medicaid</b>         | BPCI       | 9.1%  | 0.1%  | 0.3%  | 0.2%  | 0.0%  | 0.3%  | 0.014 |
|                           | Non-BPCI   | 7.3%  | -0.1% | -0.1% | 0.1%  | -0.1% | 0.2%  | 0.534 |
|                           | Difference |       | 0.3%  | 0.4%  | 0.1%  | -0.1% | 0.4%  | 0.226 |
| <b>% Black</b>            | BPCI       | 23.0% | -0.1% | 0.2%  | 0.3%  | 0.1%  | 0.5%  | 0.005 |
|                           | Non-BPCI   | 22.8% | -0.2% | 0.1%  | 0.2%  | 0.0%  | 0.5%  | 0.032 |
|                           | Difference |       | 0.1%  | 0.2%  | 0.1%  | -0.3% | 0.4%  | 0.714 |
| <b>N of comorbidities</b> | BPCI       | 5.7   | 0.00  | -0.01 | -0.01 | -0.02 | 0.01  | 0.237 |
|                           | Non-BPCI   | 5.7   | 0.00  | 0.00  | 0.01  | -0.01 | 0.02  | 0.364 |
|                           | Difference |       | 0.01  | -0.01 | -0.02 | -0.04 | 0.01  | 0.140 |

Abbreviations: BPCI, Bundled Payments for Care Improvement; CI, confidence interval; Q1, quarter one; SNF, skilled nursing facility.

**Supplementary Table S7: Differences in Changes in Quarterly Slopes in Clinical Outcomes by Wave and Dementia Subgroup**

|                           | BPCI Status | First Quarter | Baseline slope | Intervention slope | Change | Lower CI | Upper CI | p      |
|---------------------------|-------------|---------------|----------------|--------------------|--------|----------|----------|--------|
| <b>WAVE 1</b>             |             |               |                |                    |        |          |          |        |
| <b>90-day Readmission</b> | BPCI        | 44.1%         | 0.5%           | -0.4%              | -0.9%  | -1.5%    | -0.2%    | 0.011  |
|                           | Non-BPCI    | 38.0%         | -0.3%          | -0.3%              | 0.0%   | -0.7%    | 0.7%     | 0.974  |
|                           | Difference  |               | 0.8%           | -0.1%              | -0.8%  | -1.8%    | 0.1%     | 0.079  |
| <b>90-day Mortality</b>   | BPCI        | 19.8%         | -0.2%          | -0.2%              | 0.0%   | -0.7%    | 0.7%     | 1.000  |
|                           | Non-BPCI    | 21.1%         | -0.6%          | -0.1%              | 0.5%   | -0.2%    | 1.2%     | 0.131  |
|                           | Difference  |               | 0.4%           | -0.1%              | -0.5%  | -1.5%    | 0.5%     | 0.285  |
| <b>HDAH</b>               | BPCI        | 34.6          | -0.2           | 0.8                | 1.0    | 0.7      | 1.4      | <0.001 |
|                           | Non-BPCI    | 39.5          | -0.3           | 0.7                | 1.0    | 0.4      | 1.6      | 0.002  |
|                           | Difference  |               | 0.1            | 0.1                | 0.0    | -0.7     | 0.8      | 0.929  |
| <b>Initial SNF Days</b>   | BPCI        | 31.8          | -0.1           | -0.5               | -0.3   | -0.8     | 0.1      | 0.124  |
|                           | Non-BPCI    | 29.5          | 0.1            | -0.5               | -0.5   | -1.4     | 0.4      | 0.250  |
|                           | Difference  |               | -0.2           | 0.0                | 0.2    | -0.8     | 1.1      | 0.742  |
| <b>WAVE 2</b>             |             |               |                |                    |        |          |          |        |
| <b>90-day Readmission</b> | BPCI        | 35.4%         | 0.3%           | -0.5%              | -0.8%  | -1.0%    | -0.6%    | <0.001 |
|                           | Non-BPCI    | 38.0%         | 0.2%           | -0.6%              | -0.8%  | -0.9%    | -0.6%    | <0.001 |
|                           | Difference  |               | 0.1%           | 0.1%               | 0.0%   | -0.3%    | 0.2%     | 0.743  |
| <b>90-day Mortality</b>   | BPCI        | 14.1%         | -0.2%          | -0.2%              | 0.0%   | -0.2%    | 0.2%     | 0.829  |
|                           | Non-BPCI    | 14.2%         | -0.2%          | -0.1%              | 0.1%   | -0.1%    | 0.3%     | 0.253  |
|                           | Difference  |               | 0.0%           | -0.1%              | -0.1%  | -0.3%    | 0.2%     | 0.544  |
| <b>HDAH</b>               | BPCI        | 44.8          | 0.0            | 1.0                | 1.0    | 0.8      | 1.2      | <0.001 |
|                           | Non-BPCI    | 40.3          | 0.1            | 0.9                | 0.8    | 0.6      | 0.9      | <0.001 |
|                           | Difference  |               | -0.1           | 0.1                | 0.2    | 0.0      | 0.4      | 0.090  |
| <b>Initial SNF Days</b>   | BPCI        | 25.0          | -0.1           | -0.5               | -0.4   | -0.5     | -0.3     | <0.001 |
|                           | Non-BPCI    | 29.1          | 0.0            | -0.5               | -0.5   | -0.6     | -0.3     | <0.001 |
|                           | Difference  |               | -0.1           | 0.0                | 0.1    | -0.1     | 0.3      | 0.481  |



|                           |            |       |        |        |        |        |        |       |
|---------------------------|------------|-------|--------|--------|--------|--------|--------|-------|
| <b>DEMENTIA</b>           |            |       |        |        |        |        |        |       |
| <b>90-day Readmission</b> | BPCI       | 36.5% | 0.39%  | -0.33% | -0.72% | -0.98% | -0.45% | 0.000 |
|                           | Non-BPCI   | 35.9% | 0.10%  | -0.52% | -0.62% | -0.90% | -0.35% | 0.000 |
|                           | Difference |       | 0.28%  | 0.19%  | -0.09% | -0.47% | 0.29%  | 0.627 |
| <b>90-day Mortality</b>   | BPCI       | 16.5% | -0.30% | -0.14% | 0.16%  | -0.11% | 0.44%  | 0.245 |
|                           | Non-BPCI   | 16.8% | -0.30% | -0.19% | 0.12%  | -0.15% | 0.39%  | 0.393 |
|                           | Difference |       | 0.00%  | 0.05%  | 0.05%  | -0.34% | 0.43%  | 0.818 |
| <b>HDAH</b>               | BPCI       | 40.9  | 0.10   | 0.84   | 0.74   | 0.51   | 0.97   | 0.000 |
|                           | Non-BPCI   | 38.8  | 0.14   | 0.94   | 0.80   | 0.59   | 1.01   | 0.000 |
|                           | Difference |       | -0.03  | -0.09  | -0.06  | -0.37  | 0.25   | 0.699 |
| <b>Initial SNF days</b>   | BPCI       | 28.0  | -0.18  | -0.42  | -0.24  | -0.46  | -0.01  | 0.039 |
|                           | Non-BPCI   | 30.8  | 0.07   | -0.60  | -0.66  | -0.89  | -0.43  | 0.000 |
|                           | Difference |       | -0.25  | 0.18   | 0.43   | 0.10   | 0.75   | 0.009 |
| <b>NO DEMENTIA</b>        |            |       |        |        |        |        |        |       |
| <b>90-day Readmission</b> | BPCI       | 37.4% | 0.25%  | -0.36% | -0.62% | -0.82% | -0.41% | 0.000 |
|                           | Non-BPCI   | 38.9% | 0.08%  | -0.49% | -0.57% | -0.77% | -0.37% | 0.000 |
|                           | Difference |       | 0.17%  | 0.12%  | -0.05% | -0.33% | 0.24%  | 0.741 |
| <b>90-day Mortality</b>   | BPCI       | 14.7% | -0.14% | -0.21% | -0.07% | -0.26% | 0.13%  | 0.503 |
|                           | Non-BPCI   | 15.1% | -0.23% | -0.12% | 0.11%  | -0.06% | 0.28%  | 0.209 |
|                           | Difference |       | 0.08%  | -0.09% | -0.18% | -0.44% | 0.08%  | 0.184 |
| <b>HDAH</b>               | BPCI       | 43.5  | -0.03  | 0.83   | 0.86   | 0.68   | 1.04   | 0.000 |
|                           | Non-BPCI   | 40.7  | 0.19   | 0.85   | 0.67   | 0.51   | 0.83   | 0.000 |
|                           | Difference |       | -0.21  | -0.02  | 0.19   | -0.04  | 0.43   | 0.112 |
| <b>Initial SNF days</b>   | BPCI       | 26.1  | -0.07  | -0.46  | -0.39  | -0.52  | -0.26  | 0.000 |
|                           | Non-BPCI   | 28.6  | -0.11  | -0.55  | -0.44  | -0.60  | -0.27  | 0.000 |
|                           | Difference |       | 0.04   | 0.08   | 0.04   | -0.16  | 0.25   | 0.686 |

Abbreviations: BPCI, Bundled Payments for Care Improvement; CI, confidence interval; HDAH, healthy days at home; Q1, quarter one; SNF, skilled nursing facility.
